# Supplementary material
Source: Elsevier journal article supplement (https://www.sciencedirect.com/science/article/pii/S001425652200131X)
Supplement: mmc1 [file S001425652200131X:mmc1.pdf]

**Tabla suplementaria 1.** Clasificación inicial de los problemas éticos identificados por el servicio de consultoría de ética clínica.

|    |                                    |
|----|------------------------------------|
| 1. | Consentimiento                     |
| 2. | Rechazo del tratamiento            |
| 3. | Adecuación de medidas terapéuticas |
| 4. | Voluntades anticipadas             |
| 5. | Capacidad                          |
| 6. | Comunicación                       |
| a. | Con el paciente                    |
| b. | Con familiares                     |
| c. | Entre profesionales                |
| 7. | Justicia distributiva              |
| 8. | Otros                              |

**Tabla suplementaria 2.** Descripción de los servicios que solicitaron una consulta ética.

| Servicio                 | N (%)     |
|--------------------------|-----------|
| Medicina intensiva       | 9 (14,3%) |
| Medicina interna         | 8 (12,7%) |
| Neurología               | 5 (7,9%)  |
| Psiquiatría              | 5 (7,9%)  |
| Hematología              | 4 (6,3%)  |
| Neurocirugía             | 4 (6,3%)  |
| Cirugía General          | 3 (4,8%)  |
| Cirugía Vascular         | 3 (4,8%)  |
| Neumología               | 3 (4,8%)  |
| Oncología Médica         | 3 (4,8%)  |
| Anestesiología           | 2 (3,2%)  |
| Cirugía Maxilofacial     | 2 (3,2%)  |
| Nefrología               | 2 (3,2%)  |
| Radiología               | 2 (3,2%)  |
| Urología                 | 2 (3,2%)  |
| Oficina local de la AECC | 1 (1,6%)  |
| Cardiología              | 1 (1,6%)  |
| Dermatología             | 1 (1,6%)  |
| Digestivo                | 1 (1,6%)  |
| Nutrición                | 1 (1,6%)  |
| Oncología Radioterápica  | 1 (1,6%)  |

AECC: asociación española contra el cáncer.
